# Supplementary material for: Spatial separation of ribosomes and DNA in Asgard archaeal cells
Source: PubMed Central journal article supplement (PMC8776820; doi:10.1038/s41396-021-01098-3), 2021-08-31

**Supplementary Fig. 2** All z-stack images that were used to make three-dimensional surface reconstruction of true-positive Loki- and Heimdallarchaeota cells that are shown in corresponding panels from Fig. 2 (F2) and Supplementary Fig. 1 (SF1). Overlay of FITC, Alexa594, and DAPI are depicted. The scale bar is 1  $\mu\text{m}$ .

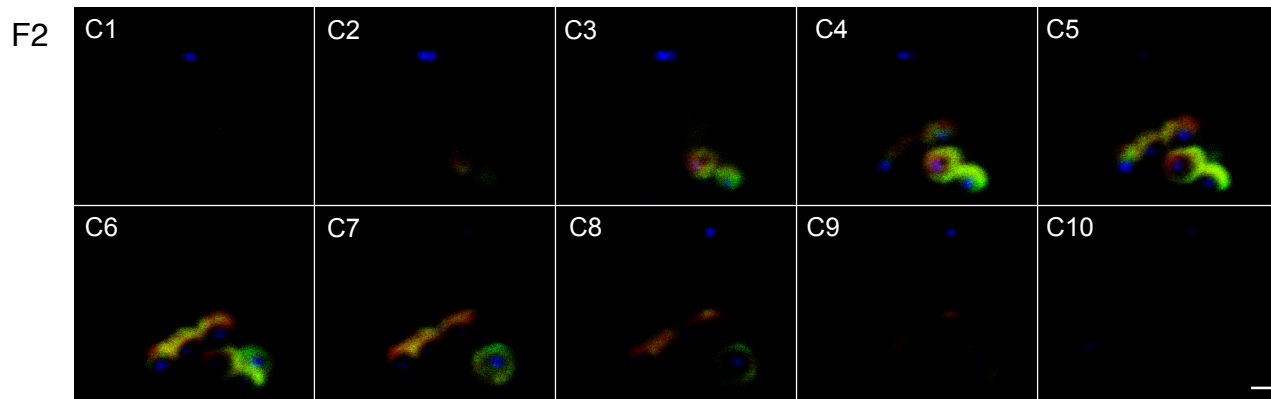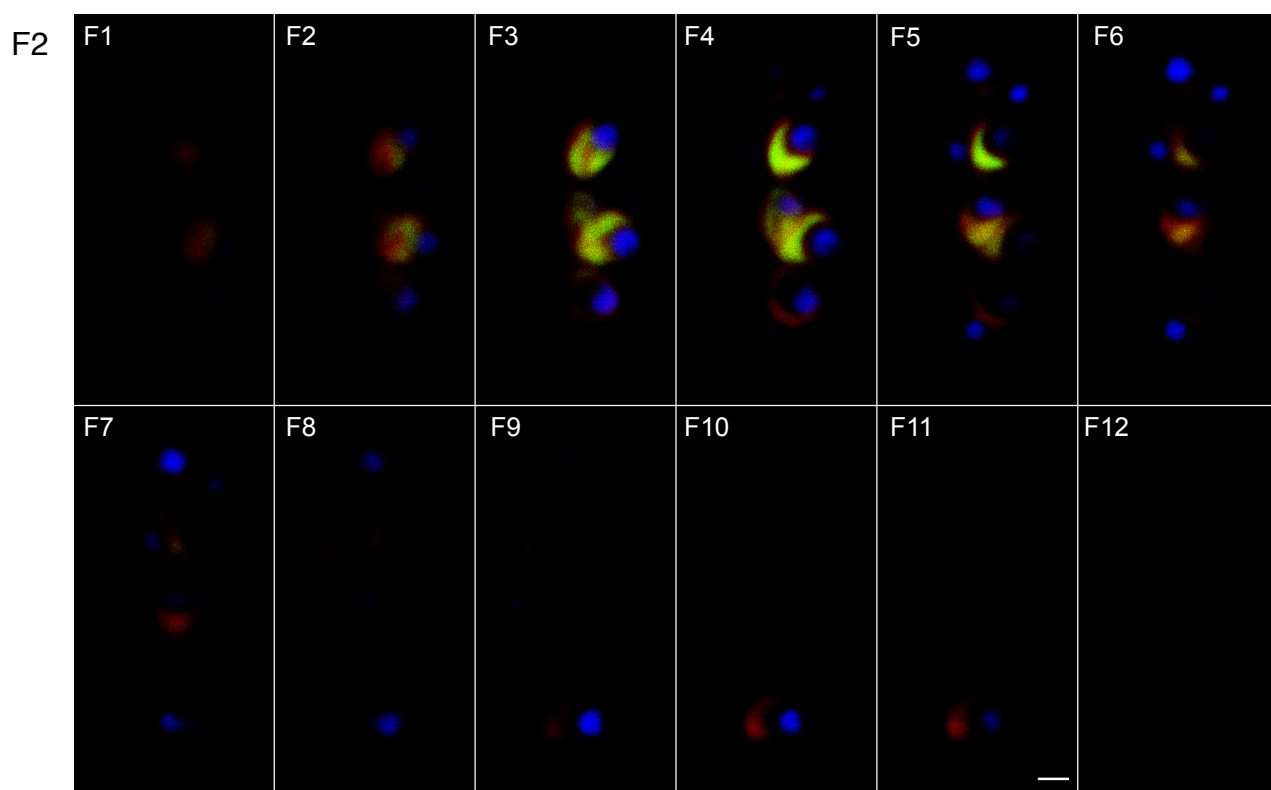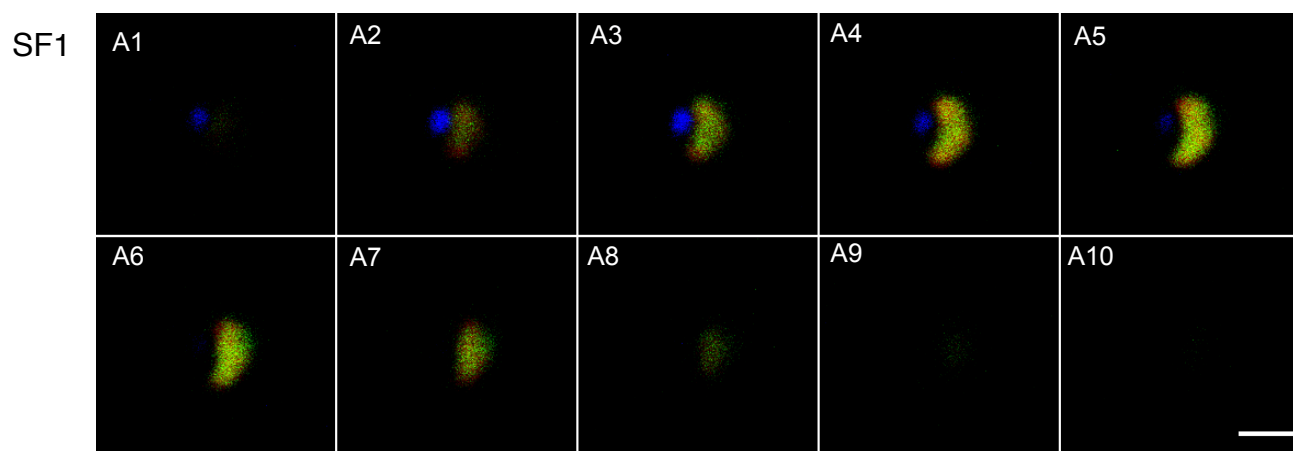

SF1

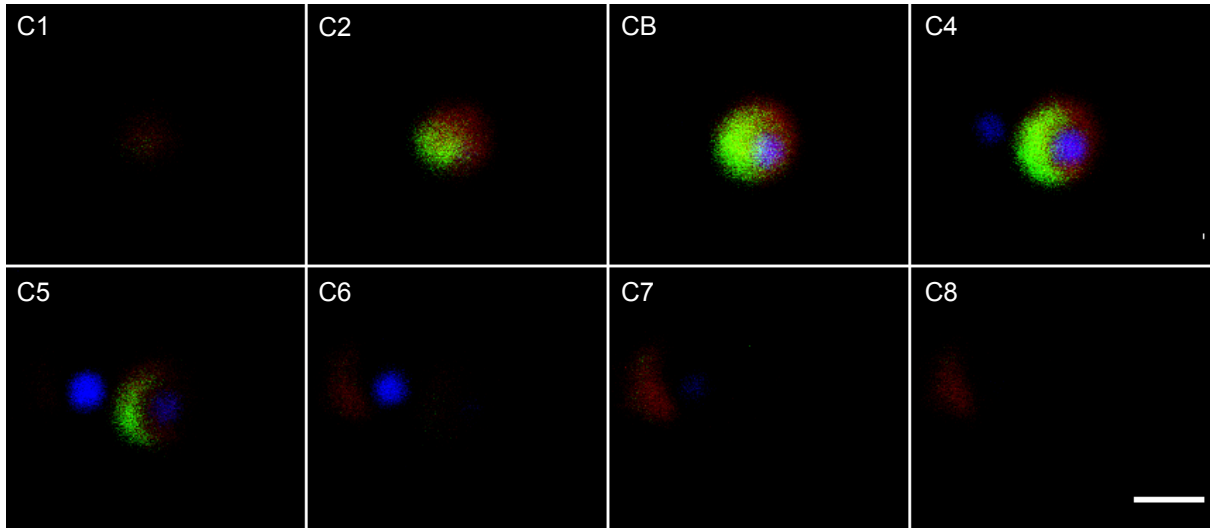

SF1

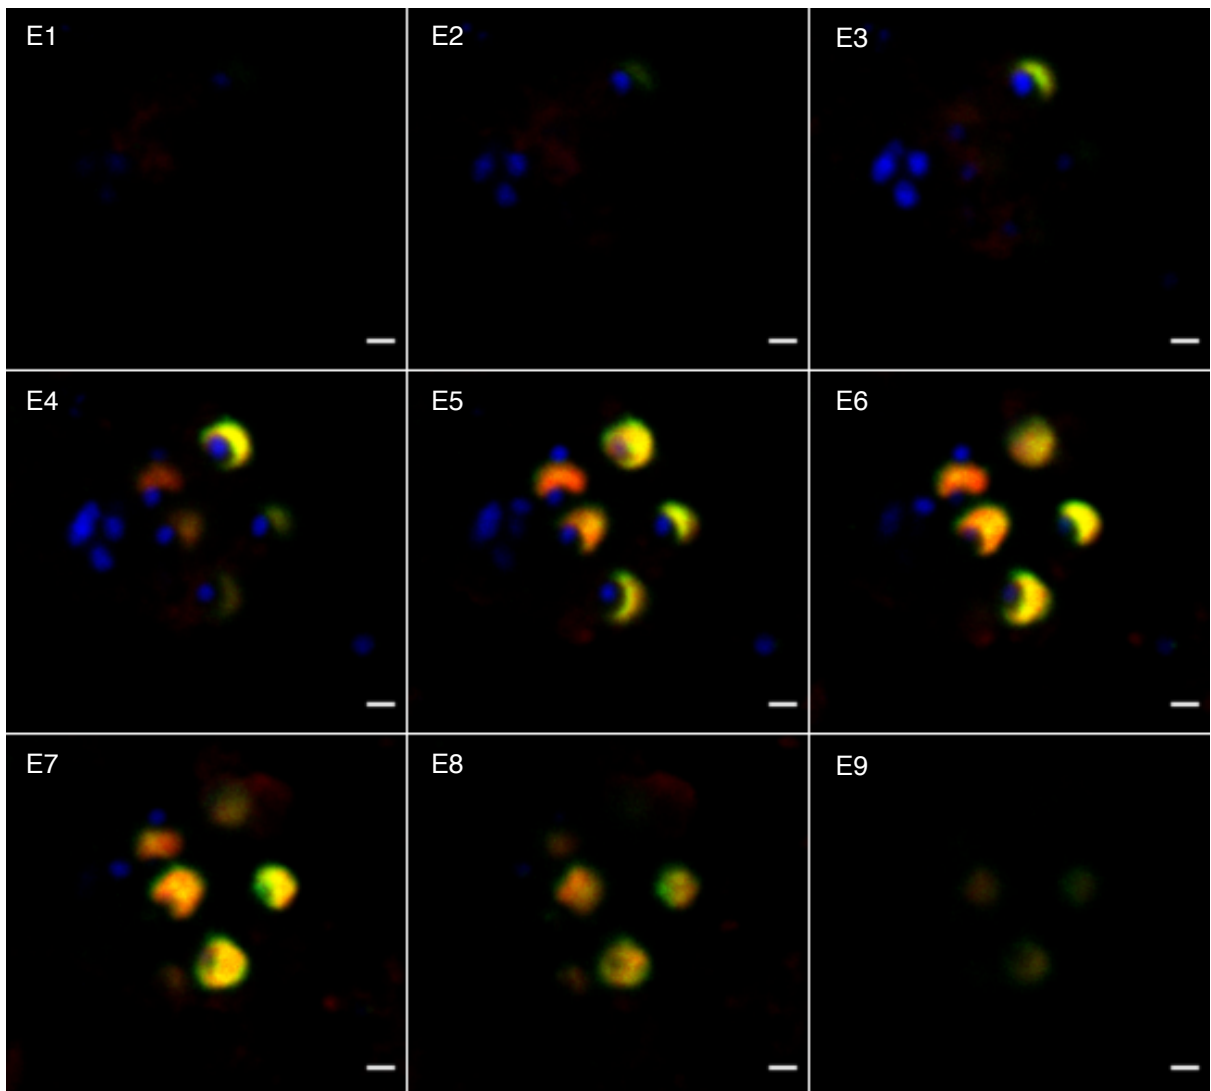

SF1

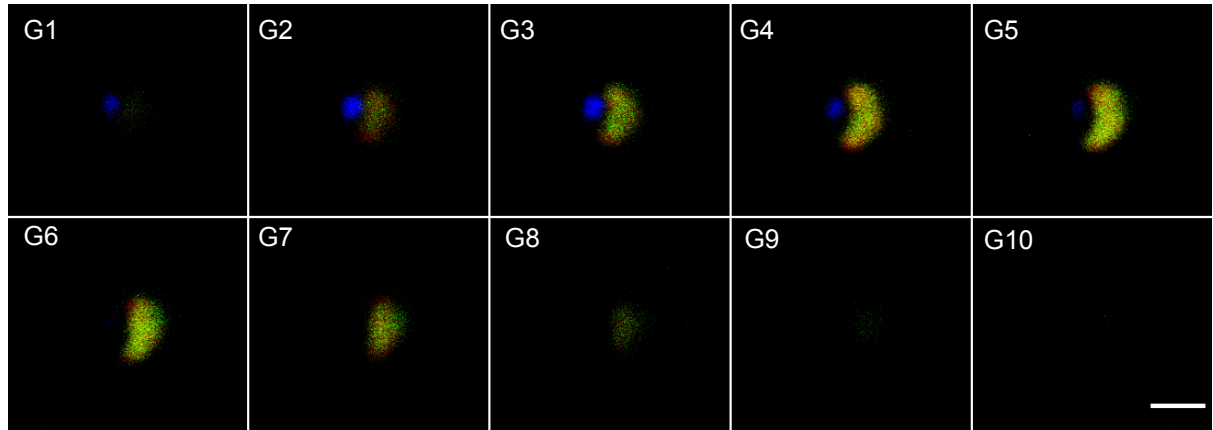

SF1

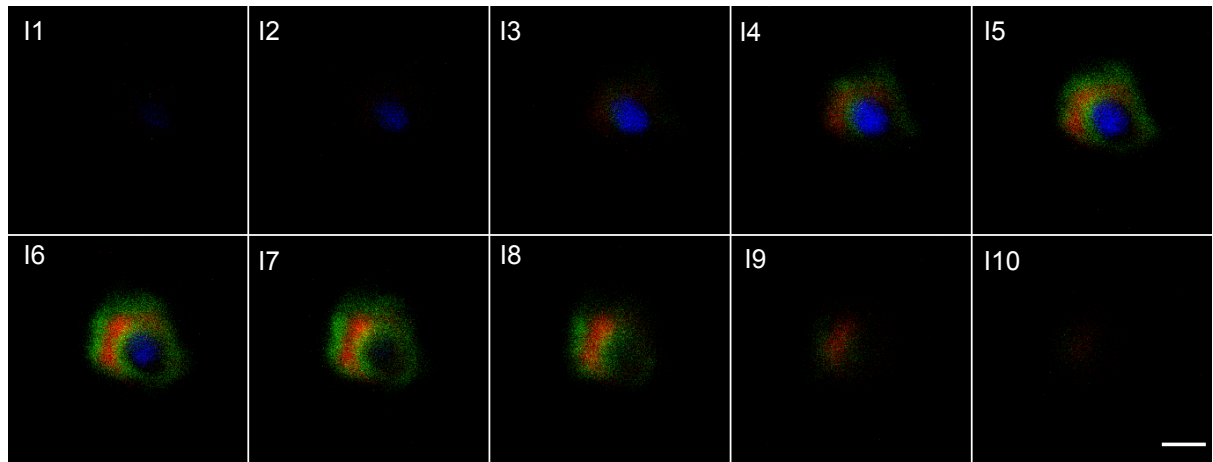

Supplement: 41396_2021_1098_MOESM3_ESM.pdf [file 41396_2021_1098_MOESM3_ESM.pdf]
