# Supplementary material for: Spatial separation of ribosomes and DNA in Asgard archaeal cells
Source: PubMed Central journal article supplement (PMC8776820; doi:10.1038/s41396-021-01098-3), 2021-08-31
Supplement: 41396_2021_1098_MOESM7_ESM.pdf [file 41396_2021_1098_MOESM7_ESM.pdf]

| Probe             | Target             | Probe sequence (5' - 3')       | Formamide (%) | Reference             |
|-------------------|--------------------|--------------------------------|---------------|-----------------------|
| <b>LOK1183</b>    | Lokiarchaeota      | CTG ACC TGC CTT TGC CCG CT     | 20            | This study            |
| <b>LOK1378</b>    | Lokiarchaeota      | GTG TGC AAG GAG CAG AGA CG     | 20            | This study            |
| <b>HEIM329</b>    | Heimdallarchaeota  | GCA CTC GCA GAG CTG GTT TTA CC | 20            | This study            |
| <b>HEIM529</b>    | Heimdallarchaeota  | CAC ACC GTA GTG CTA GGA CCA GT | 20            | This study            |
| <b>ARC915</b>     | Archaea            | GTG CTC CCC CGC CAA TTC CT     | 35            | Stahl and Amann, 1990 |
| <b>EUB338 I</b>   | Most Bacteria      | GCT GCC TCC CGT AGG AGT        | 35            | Daims et al., 1999    |
| <b>EUB338 II</b>  | Planctomycetales   | GCA GCC ACC CGT AGG TGT        | 35            | Daims et al., 1999    |
| <b>EUB338 III</b> | Verrucomicrobiales | GCT GCC ACC CGT AGG TGT        | 35            | Daims et al., 1999    |
| <b>NON338</b>     | Non-sense          | ACT CCT ACG GGA GGC AGC        | 20            | Amann et al., 1990    |

| B              | SILVA        |      | Aarhus Bay sediments (this study) |      | Non-target hits<br>SILVA |                |                |
|----------------|--------------|------|-----------------------------------|------|--------------------------|----------------|----------------|
|                | Target group | Hits | Target group                      | Hits | 0 <sup>a</sup>           | 1 <sup>a</sup> | 2 <sup>a</sup> |
| <b>LOK1183</b> | 541          | 493  | 684                               | 628  | 5                        | 11             | 735            |
| <b>LOK1378</b> | 468          | 441  | 684                               | 583  | 10                       | 8270           | 10163          |
| <b>HEIM329</b> | 27           | 27   | 31                                | 31   | 0                        | 1              | 95             |
| <b>HEIM529</b> | 27           | 24   | 31                                | 30   | 0                        | 0              | 34             |

<sup>a</sup>number of mismatches between probe and non-target hit

| Probe             | Target                 | Probe sequence (5' - 3')                 | Formamide (%) |
|-------------------|------------------------|------------------------------------------|---------------|
| <b>c11LOK1183</b> | Competitor for LOK1183 | CTG ACC TGC <b>CGT</b> TGC CCG CT        | 20            |
| <b>LOK1183-h1</b> | Helper for LOK1183     | CCT TCC TCM RTC TTA TCG A                | 20            |
| <b>LOK1183-h2</b> | Helper for LOK1183     | CAG GGG TTT CGG GGC ATA                  | 20            |
| <b>c16LOK1378</b> | Competitor for LOK1378 | GTG TGC AAG GAG CAG <b>GGA</b> CG        | 20            |
| <b>c20LOK1378</b> | Competitor for LOK1378 | GTG TGC AAG GAG CAG <b>GGA CA</b>        | 20            |
| <b>c2LOK1378</b>  | Competitor for LOK1378 | <b>GAG</b> TGC AAG GAG CAG <b>GGA</b> CG | 20            |
| <b>LOK1378-h1</b> | Helper for LOK1378     | GTG GTG CTC CCC CGC CAA TT               | 20            |
| <b>LOK1378-h2</b> | Helper for LOK1378     | AGY ACA CTC GGA TGG AGC G                | 20            |
| <b>HEIM329-h1</b> | Helper for HEIM329     | GTC TKA GTG TCC TTC TCG GGG C            | 20            |
| <b>HEIM329-h2</b> | Helper for HEIM329     | CGC GCA TTG GGC ACA ATT CCT AA           | 20            |
| <b>HEIM529-h4</b> | Helper for HEIM529     | AGC CTT GCC CTC TGC TTG CTG TT           | 20            |
| <b>HEIM529-h5</b> | Helper for HEIM529     | CGG CTA CGG ATG CTT TAA GCC CA           | 20            |

**Supplementary Table 1** Oligonucleotide probes used in this study. **A** Names, target groups, sequences, and formamide concentrations for newly designed Loki- and Heimdallarchaeota probes. **B** Number of the sequences in the target groups and the hits are shown together with non-target hits at 0,1 and 2 mismatches. For LOK1183 and LOK1378, only the sequences which contain the probe-target regions in SILVA database v132 (Quast et al. 2013) are considered. **C** Sequences and formamide concentrations for helper and competitor probes.
